# Supplementary material for: Chemical and photothermal synergistic antimicrobial treatment for enhanced wound healing based on light/pH responsive nanocomposites
Source: Royal Society of Chemistry journal article supplement (doi:10.1039/d4nj00946k), 2024-01-01
Supplement: d4nj00946k1.pdf [file d4nj00946k1.pdf]

## Supplementary Material

### Chemical and photothermal synergistic antimicrobial treatment for enhanced wound healing based on light/pH responsive nanocomposites

Tao Gong,<sup>a†</sup> Qing Ma,<sup>a†</sup> Kaili Qin,<sup>a†</sup> Lingxi Wei,<sup>a</sup> Chaochao Wen,<sup>b</sup> Huirui Zhu,<sup>a</sup> Xiaoning Li,<sup>a</sup> Bingmei Chang,<sup>a,c</sup> Wenting Liang <sup>\*b</sup> and Rui Guo <sup>\*a</sup>

<sup>a</sup> Department of Biochemistry and Molecular Biology, Shanxi Medical University, Taiyuan 030001, China; 15834151276@139.com (R. G.).

<sup>b</sup> Institute of Environmental Science, Department of Chemistry, Shanxi University, Taiyuan 030006, China; liangwt@sxu.edu.cn (W. L.).

<sup>c</sup> Key Laboratory of Cellular Physiology (Shanxi Medical University), Ministry of Education, Taiyuan 030001, China.

<sup>†</sup> Tao Gong, Qing Ma and Kaili Qin contributed equally to this study.

**1. Lagergren's pseudo-first-order kinetic model (Eq (1)) and Ho's pseudo-second-order model (Eq (2))**

$$\ln(q_e - q_t) = \ln(q_e) - k_1 t \quad (1)$$

$$\frac{t}{q_t} = \frac{1}{k_2 q_e^2} + \frac{t}{q_e} \quad (2)$$

where, in equation (1) and (2):  $q_e$  (mg/g) is equilibrium adsorption capacity;  $q_t$  (mg/g) is the drug loading at different time points;  $t$  (min) is the drug loading time;  $k_1$  and  $k_2$  are kinetic constants.

**2. Langmuir model (Eq (3)) and Freundlich model (Eq (4))**

$$\frac{C_e}{q_e} = \frac{C_e}{q_m} + \frac{1}{q_m K_L} \quad (3)$$

$$\ln q_e = \ln K_f + \frac{1}{n} \ln C_e \quad (4)$$

where, in equation (3) and (4):  $C_e$  (mg/L) is the mass concentration at the time of drug loading equilibrium;  $q_m$  (mg/g) is the drug load in the saturated state;  $q_e$  (mg/g) is the drug load at equilibrium;  $K_L$  (mg/L) is the dissociation constant;  $K_f$  (mL/g) is the Freundlich constant;  $1/n$  is the Freundlich component factor.

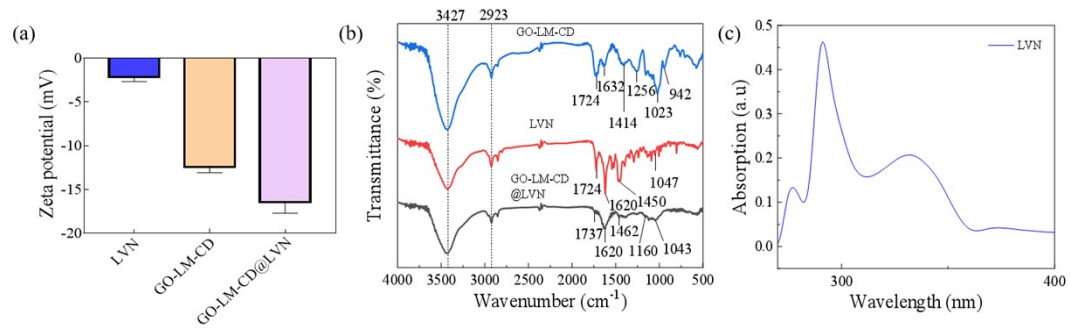

**Figure S1.** (a) The Zeta potential; (b) FTIR spectra of GO-LM-CD, LVN, GO-LM-CD@LVN; (c)

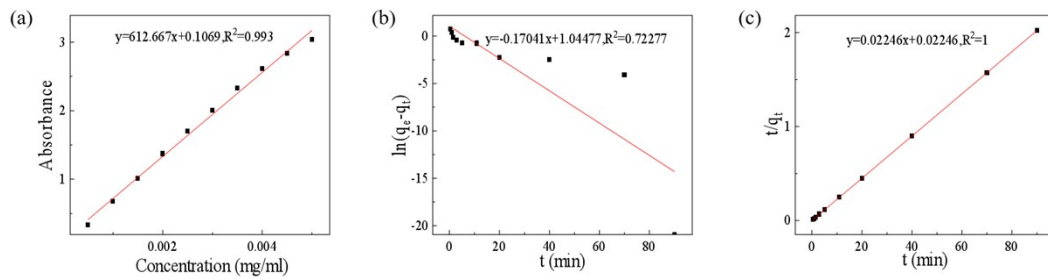

**Figure S2.** (a) Standard curve for LVN; (b) Line fitting with Lagergren's pseudo-first-order model; (c) Line fitting with Ho's pseudo-second-order model for adsorption kinetics.

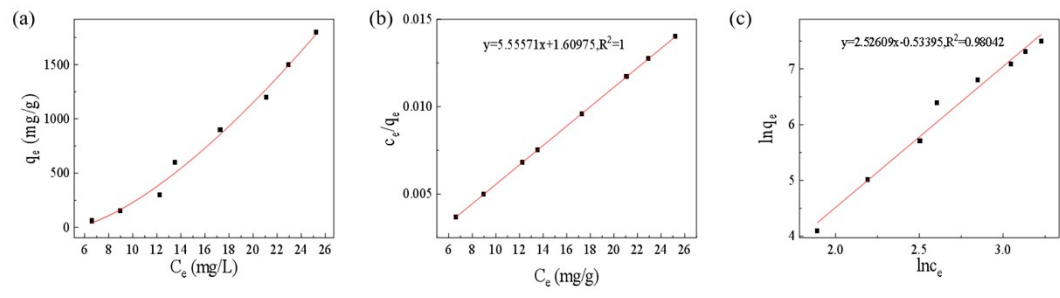

**Figure S3.** (a) Adsorption isotherms of GO-LM-CD on LVN; (b) Linear fitting of Langmuir adsorption of GO-LM-CD to LVN; (c) Freundlich adsorption of GO-LM-CD to LVN.

**Table S1.** The pharmacokinetic parameters of GO-LM-CD on LVN.

| Lagergren's pseudo-first-order kinetic model |                    |        | Ho's pseudo-second-order kinetic model |                                |        |
|----------------------------------------------|--------------------|--------|----------------------------------------|--------------------------------|--------|
| $q_e$ (mg/g)                                 | $k_1$ ( $h^{-1}$ ) | $R^2$  | $q_e$ (mg/g)                           | $k_2$ ( $g(mg \cdot h)^{-1}$ ) | $R^2$  |
| 2.8427                                       | 0.1704             | 0.7228 | 44.5236                                | 0.4169                         | 1.0000 |

**Table S2.** Related parameters of Langmuir isotherm and Freundlich isotherm adsorption models for LVN by GO-LM-CD.

| Langmuir isotherm Model |               |        | Freundlich isotherm Model |              |         |
|-------------------------|---------------|--------|---------------------------|--------------|---------|
| $q_m$ (mg/g)            | $K_L$ (mg/mL) | $R^2$  | n                         | $K_f$ (mL/g) | $R^2$   |
| 0.1780                  | 3.4513        | 1.0000 | 0.39586                   | -0.18782     | 0.98042 |

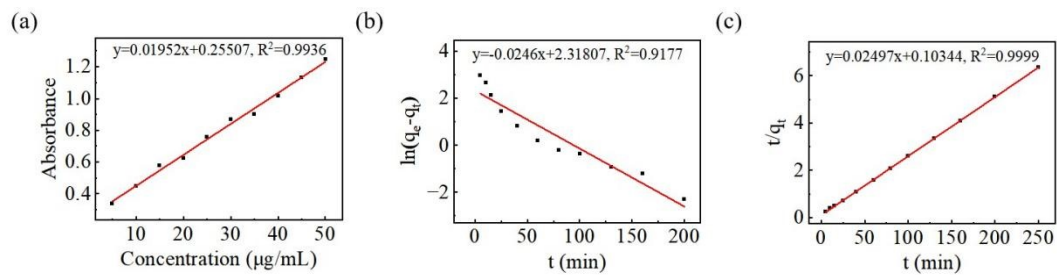

**Figure S4.** (a) Standard curve for OXY; (b) Line fitting with Lagergren's pseudo-first-order model; (c) Line fitting with Ho's pseudo-second-order model for adsorption kinetics.



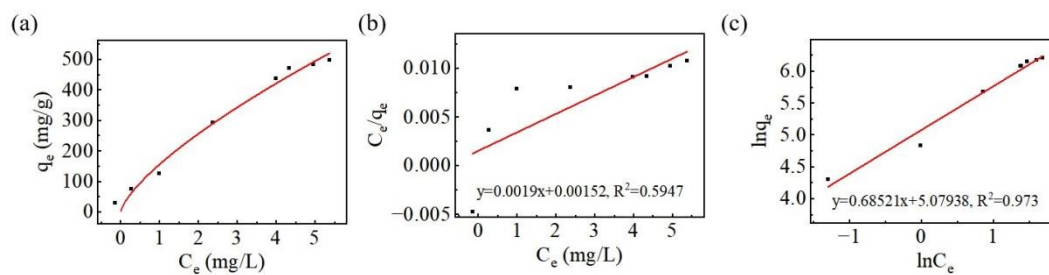

**Figure S5.** (a) Adsorption isotherms of GO-LM-CD on OXY; (b) Linear fitting of Langmuir adsorption of GO-LM-CD to OXY; (c) Freundlich adsorption of GO-LM-CD to OXY.

**Table S3.** The pharmacokinetic parameters of GO-LM-CD on OXY.

| Lagergren's pseudo-first-order kinetic model |                    |        | Ho's pseudo-second-order kinetic model |                                |        |
|----------------------------------------------|--------------------|--------|----------------------------------------|--------------------------------|--------|
| $q_e$ (mg/g)                                 | $k_1$ ( $h^{-1}$ ) | $R^2$  | $q_e$ (mg/g)                           | $k_2$ ( $g(mg \cdot h)^{-1}$ ) | $R^2$  |
| 10.1561                                      | 0.0246             | 0.9177 | 40.0481                                | 0.0060                         | 0.9999 |

**Table S4.** Related parameters of Langmuir isotherm and Freundlich isotherm adsorption models for OXY by GO-LM-CD.

| Langmuir isotherm Model |               |        | Freundlich isotherm Model |              |        |
|-------------------------|---------------|--------|---------------------------|--------------|--------|
| $q_m$ (mg/g)            | $K_L$ (mg/mL) | $R^2$  | n                         | $K_f$ (mL/g) | $R^2$  |
| 526.3158                | 1.2500        | 0.5947 | 1.4594                    | 160.6744     | 0.9730 |

**Table S5.** Scoring criteria for skin anaphylaxis.

| cutaneous reaction                                    |                                                                       | score |
|-------------------------------------------------------|-----------------------------------------------------------------------|-------|
| erythema                                              | edema                                                                 |       |
| no erythema                                           | no edema                                                              | 0     |
| mild erythema, barely visible                         | mild edema, barely visible                                            | 1     |
| moderate erythema, clearly visible                    | moderate edema, clearly visible                                       | 2     |
| heavy erythema                                        | heavy edema (skin uplift of about 1 mm and clear outline)             | 3     |
| severe erythema (amaranth) to slight eschar formation | severe edema (skin uplift of about 1 mm above or blisters or rupture) | 4     |

**Table S6.** Evaluation criteria for skin sensitization.

| sensitization rate<br>(%) | edema | allergy reaction intensity |
|---------------------------|-------|----------------------------|
| 0-8                       | I     | weak sensitization         |
| 9-28                      | II    | mild sensitization         |
| 29-64                     | III   | moderate sensitization     |
| 65-80                     | IV    | strong sensitization       |
| 81-100                    | V     | very strong sensitization  |

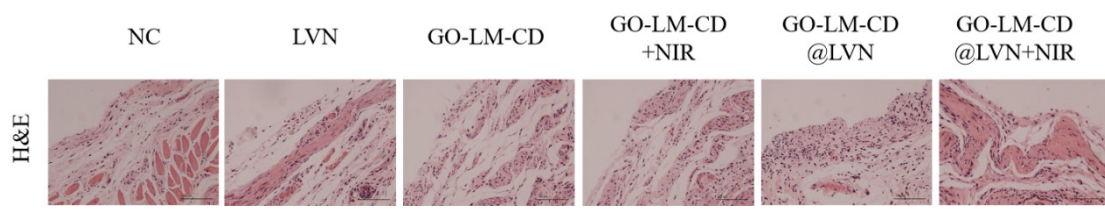

**Figure S6.** H&E staining images of mice tissues were taken on the 14th day (Scale bar: 50 μm)
